# Supplementary material for: Sample Shuttling Relaxometry of Contrast Agents: NMRD Profiles above 1 T with a Single Device
Source: Springer Nature journal article supplement (doi:10.1007/s00723-015-0751-7), 2016-01-30
Supplement: MOESM1 [file 723_2015_751_MOESM1_ESM.pdf]

Supporting information:

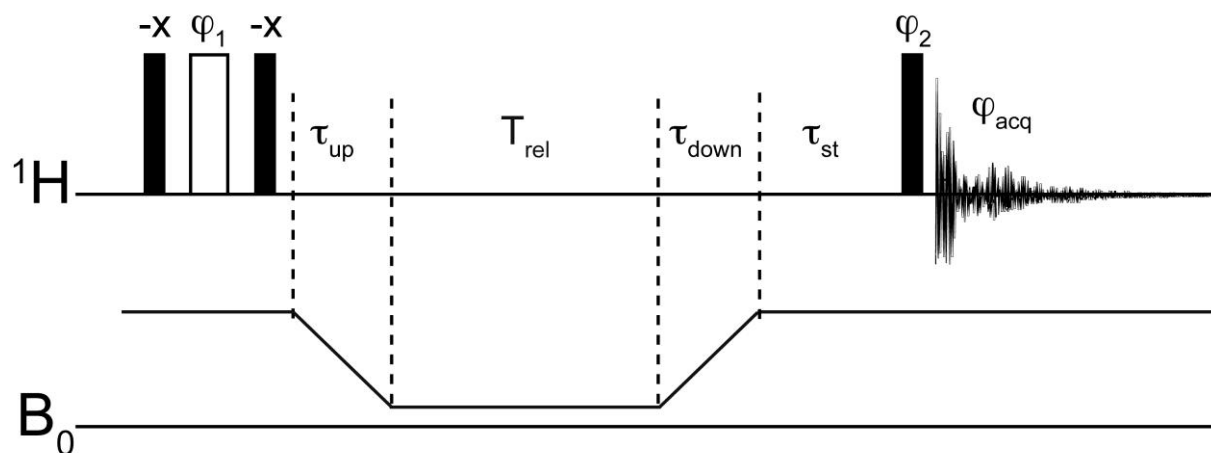

**Figure S1:** Pulse sequence used for the measurement of low-field longitudinal relaxation of water protons on the sample shuttle apparatus. Narrow filled and wide open rectangles represent  $90^\circ$  and  $180^\circ$  pulses respectively. The recycle delay was 5 s,  $\tau_{up}$  and  $\tau_{down}$  were between 60 and 200 ms, depending on the low-field position. The stabilization delay  $\tau_{st}$  was 250 ms. The phase cycle is  $\phi_1 = \{x, y\}$ ;  $\phi_2 = \{x, x, -x, -x, y, y, -y, -y\}$ ; and  $\phi_{acq} = \{x, -x, -x, x, y, -y, -y, y\}$ . The inversion of proton polarization every other scan leads to a decay of measured intensities (or integrals) towards zero. The delays  $T_{rel}$  were adapted to the relaxation rates at each low field. Ten different delays were chosen and two were repeated. The difference between the minimum and the maximum delays  $T_{rel}$  varied between 250 ms and 3.5 s for the USPIO solution and between 0.8 and 1 s for the Gadospin<sup>TM</sup> solution.
